# Supplementary material for: Refugee Children’s Social–Emotional Capacities: Links to Mental Health upon Resettlement and Buffering Effects on Pre-Migratory Adversity
Source: MDPI journal article supplement (doi:10.3390/ijerph182212180), 2021-11-19
Supplement: s1 [file s1]

**Table S1.** Emotion regulation regression models predicting child mental health for each adversity type

|                                                       | Internalizing |     |          | Externalizing |     |          |
|-------------------------------------------------------|---------------|-----|----------|---------------|-----|----------|
|                                                       | $\beta$       | SE  | <i>p</i> | $\beta$       | SE  | <i>p</i> |
| <b>Child pre-migratory adversity model</b>            |               |     |          |               |     |          |
| Child age                                             | .09           | .08 | .28      | -.17          | .07 | .01      |
| Child gender (male)                                   | .08           | .08 | .30      | .22           | .07 | .002     |
| Length of stay in Canada                              | -.002         | .08 | .98      | -.13          | .08 | .10      |
| Child pre-migratory adversity                         | .01           | .10 | .92      | .13           | .08 | .12      |
| Emotion regulation                                    | -.52          | .07 | <.001    | -.58          | .07 | <.001    |
| Child Pre-Migratory Adversity x Emotion Regulation    | -.02          | .08 | .85      | .01           | .08 | .85      |
| <b>Parental pre-migratory adversity model</b>         |               |     |          |               |     |          |
| Child age                                             | .09           | .09 | .30      | -.14          | .07 | .07      |
| Child gender (male)                                   | .11           | .08 | .17      | .30           | .07 | <.001    |
| Length of stay in Canada                              | .03           | .09 | .76      | -.11          | .08 | .14      |
| Parental pre-migratory adversity                      | .15           | .11 | .18      | .14           | .07 | .05      |
| Emotion regulation                                    | -.50          | .07 | <.001    | -.56          | .07 | <.001    |
| Parental Pre-Migratory Adversity x Emotion Regulation | .003          | .09 | .98      | -.13          | .07 | .06      |
| <b>Familial pre-migratory adversity model</b>         |               |     |          |               |     |          |
| Child age                                             | .13           | .09 | .13      | -.13          | .08 | .097     |
| Child gender (male)                                   | .11           | .08 | .14      | .27           | .07 | <.001    |
| Length of stay in Canada                              | .07           | .08 | .40      | -.06          | .08 | .43      |
| Familial pre-migratory adversity                      | .19           | .10 | .06      | .24           | .09 | .005     |
| Emotion regulation                                    | -.51          | .06 | <.001    | -.58          | .07 | <.001    |
| Familial Pre-Migratory Adversity x Emotion Regulation | -.13          | .10 | .17      | -.14          | .07 | .047     |

**Table S2.** Sympathy regression models predicting child mental health for each adversity type

|                                               | Internalizing |     |          | Externalizing |            |             |
|-----------------------------------------------|---------------|-----|----------|---------------|------------|-------------|
|                                               | $\beta$       | SE  | <i>p</i> | $\beta$       | SE         | <i>p</i>    |
| <b>Child pre-migratory adversity model</b>    |               |     |          |               |            |             |
| Child age                                     | .18           | .10 | .06      | -.02          | .09        | .79         |
| Child gender (male)                           | .11           | .10 | .25      | <b>.18</b>    | <b>.09</b> | <b>.045</b> |
| Length of stay in Canada                      | .05           | .10 | .62      | .03           | .10        | .77         |
| Child pre-migratory adversity                 | .04           | .11 | .74      | .12           | .09        | .19         |
| Sympathy                                      | .08           | .10 | .40      | -.13          | .11        | .23         |
| Child Pre-Migratory Adversity x Sympathy      | .05           | .12 | .68      | -.14          | .11        | .17         |
| <b>Parental pre-migratory adversity model</b> |               |     |          |               |            |             |
| Child age                                     | .17           | .10 | .08      | -.04          | .09        | .68         |
| Child gender (male)                           | .15           | .09 | .12      | <b>.23</b>    | <b>.09</b> | <b>.02</b>  |
| Length of stay in Canada                      | .09           | .10 | .35      | .03           | .10        | .76         |
| Parental pre-migratory adversity              | .18           | .13 | .15      | <b>.19</b>    | <b>.09</b> | <b>.04</b>  |
| Sympathy                                      | .08           | .09 | .38      | <b>-.20</b>   | <b>.10</b> | <b>.04</b>  |
| Parental Pre-Migratory Adversity x Sympathy   | -.04          | .13 | .77      | -.08          | .10        | .40         |
| <b>Familial pre-migratory adversity model</b> |               |     |          |               |            |             |
| Child age                                     | .18           | .10 | .06      | -.04          | .09        | .69         |
| Child gender (male)                           | .14           | .09 | .13      | <b>.21</b>    | <b>.09</b> | <b>.02</b>  |
| Length of stay in Canada                      | .09           | .09 | .32      | .05           | .10        | .64         |
| Familial pre-migratory adversity              | .23           | .12 | .06      | <b>.21</b>    | <b>.09</b> | <b>.02</b>  |
| Sympathy                                      | .10           | .09 | .24      | -.16          | .09        | .08         |
| Familial Pre-Migratory Adversity x Sympathy   | .09           | .14 | .53      | -.06          | .10        | .50         |

**Table S3.** Optimism regression models predicting child mental health for each adversity type

|                                               | Internalizing |     |       | Externalizing |     |      |
|-----------------------------------------------|---------------|-----|-------|---------------|-----|------|
|                                               | $\beta$       | SE  | p     | $\beta$       | SE  | p    |
| <b>Child pre-migratory adversity model</b>    |               |     |       |               |     |      |
| Child age                                     | .18           | .09 | .05   | -.07          | .09 | .45  |
| Child gender (male)                           | .03           | .09 | .74   | .18           | .09 | .05  |
| Length of stay in Canada                      | .06           | .09 | .52   | -.04          | .10 | .67  |
| Child pre-migratory adversity                 | -.01          | .11 | .90   | .13           | .10 | .19  |
| Optimism                                      | -.28          | .09 | .003  | -.23          | .09 | .009 |
| Child Pre-Migratory Adversity x Optimism      | .06           | .12 | .63   | -.01          | .10 | .94  |
| <b>Parental pre-migratory adversity model</b> |               |     |       |               |     |      |
| Child age                                     | .19           | .09 | .03   | -.07          | .09 | .42  |
| Child gender (male)                           | .09           | .09 | .33   | .24           | .09 | .007 |
| Length of stay in Canada                      | .09           | .08 | .25   | -.03          | .09 | .73  |
| Parental pre-migratory adversity              | .23           | .11 | .04   | .20           | .09 | .02  |
| Optimism                                      | -.33          | .10 | .001  | -.25          | .10 | .01  |
| Parental Pre-Migratory Adversity x Optimism   | -.19          | .11 | .09   | -.01          | .10 | .91  |
| <b>Familial pre-migratory adversity model</b> |               |     |       |               |     |      |
| Child age                                     | .20           | .09 | .02   | -.06          | .09 | .48  |
| Child gender (male)                           | .08           | .09 | .40   | .22           | .09 | .01  |
| Length of stay in Canada                      | .16           | .09 | .09   | .01           | .10 | .89  |
| Familial pre-migratory adversity              | .36           | .12 | .003  | .29           | .12 | .01  |
| Optimism                                      | -.31          | .09 | <.001 | -.25          | .09 | .004 |
| Familial Pre-Migratory Adversity x Optimism   | -.31          | .13 | .02   | -.10          | .12 | .41  |

**Table S4.** Trust regression models predicting child mental health for each adversity type

|                                               | Internalizing |            |             | Externalizing |            |             |
|-----------------------------------------------|---------------|------------|-------------|---------------|------------|-------------|
|                                               | $\beta$       | SE         | <i>p</i>    | $\beta$       | SE         | <i>p</i>    |
| <b>Child pre-migratory adversity model</b>    |               |            |             |               |            |             |
| Child age                                     | <b>.18</b>    | <b>.09</b> | <b>.04</b>  | -.07          | .09        | .42         |
| Child gender (male)                           | .12           | .09        | .18         | <b>.25</b>    | <b>.09</b> | <b>.005</b> |
| Length of stay in Canada                      | .05           | .09        | .55         | -.03          | .09        | .73         |
| Child pre-migratory adversity                 | .09           | .11        | .40         | .12           | .11        | .24         |
| Trust                                         | <b>.29</b>    | <b>.09</b> | <b>.002</b> | .08           | .09        | .39         |
| Child Pre-Migratory Adversity x Trust         | -.15          | .11        | .17         | .08           | .10        | .44         |
| <b>Parental pre-migratory adversity model</b> |               |            |             |               |            |             |
| Child age                                     | .17           | .09        | .07         | -.06          | .09        | .51         |
| Child gender (male)                           | .18           | .09        | .06         | <b>.29</b>    | <b>.09</b> | <b>.001</b> |
| Length of stay in Canada                      | .09           | .09        | .31         | -.03          | .10        | .78         |
| Parental pre-migratory adversity              | .23           | .14        | .11         | .19           | .11        | .07         |
| Trust                                         | <b>.19</b>    | <b>.09</b> | <b>.03</b>  | .03           | .10        | .77         |
| Parental Pre-Migratory Adversity x Trust      | -.09          | .13        | .47         | -.01          | .11        | .95         |
| <b>Familial pre-migratory adversity model</b> |               |            |             |               |            |             |
| Child age                                     | <b>.17</b>    | <b>.09</b> | <b>.06</b>  | -.06          | .09        | .50         |
| Child gender (male)                           | .14           | .09        | .11         | <b>.27</b>    | <b>.09</b> | <b>.002</b> |
| Length of stay in Canada                      | .10           | .08        | .25         | -.003         | .10        | .97         |
| Familial pre-migratory adversity              | .25           | .14        | .08         | <b>.22</b>    | <b>.10</b> | <b>.03</b>  |
| Trust                                         | <b>.24</b>    | <b>.09</b> | <b>.007</b> | .04           | .09        | .62         |
| Familial Pre-Migratory Adversity x Trust      | -.18          | .14        | .19         | .02           | .11        | .84         |
